# Supplementary material
Source: PubMed Central journal article supplement (PMC9957938)
Supplement: NIHMS1856977-supplement-2.pdf [file NIHMS1856977-supplement-2.pdf]

1 **Supplementary information**

2 **Seven supplement figures were included in the supplemental information.**

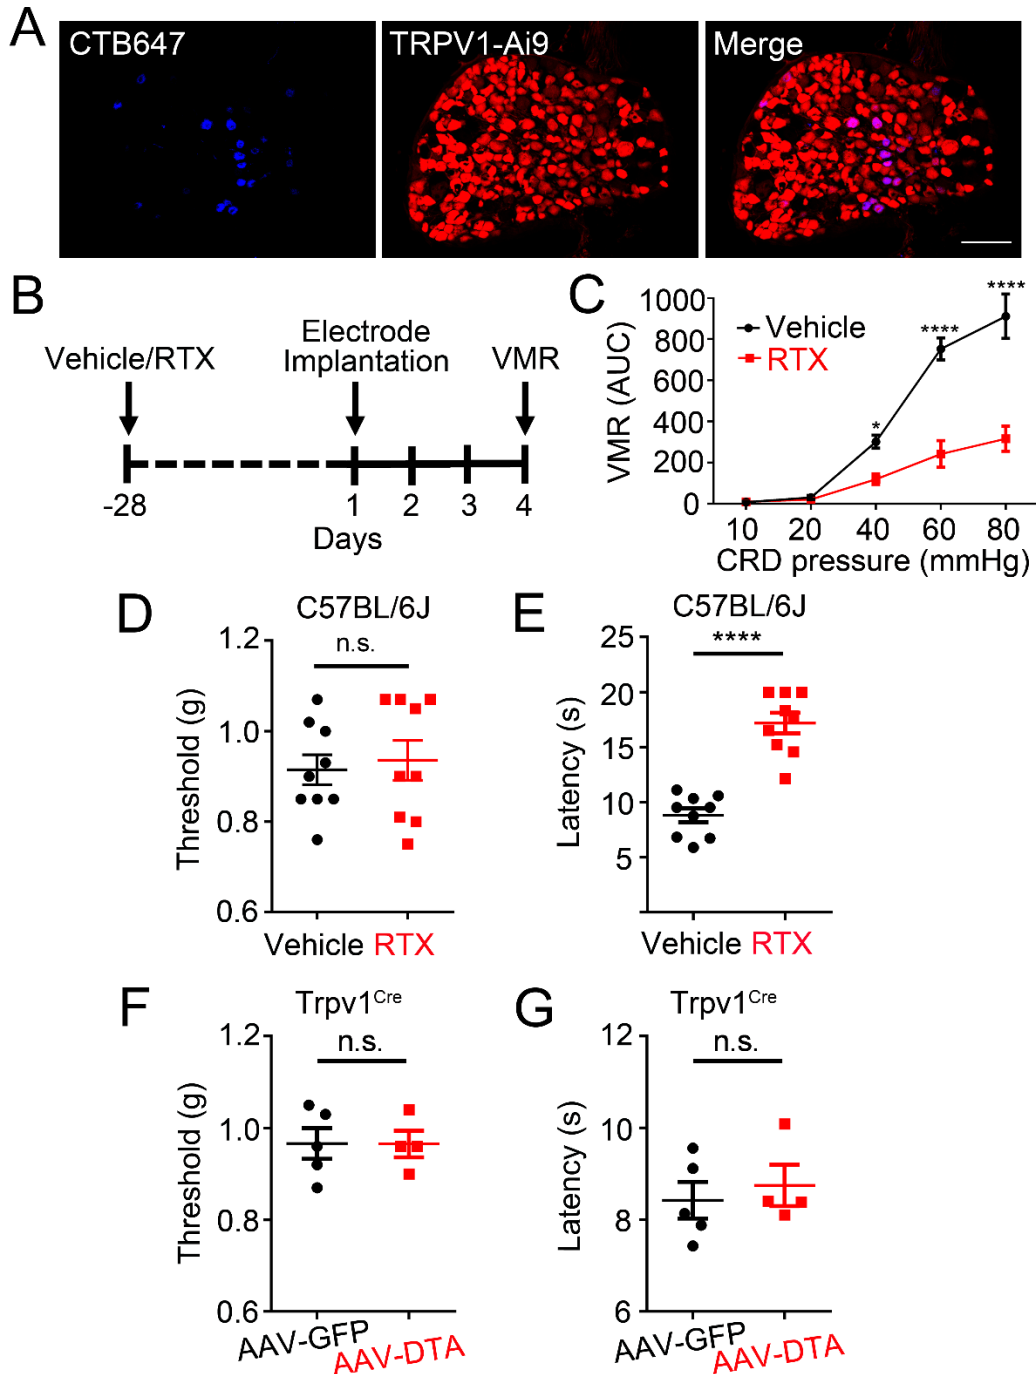

3

4 **Figure S1 (Related to Figure 1). Effects of ablation of TRPV1-expressing nociceptors on**

5 **visceral and somatic sensations. (A).** Representative images of CTB-647 retrogradely labeled

6 neurons in the L6 DRG sections from Trpv1<sup>Cre</sup>::Ai9 mice. CTB 647-positive neurons appear blue,

7 TRPV1-tdTomato-positive neurons appear red. Images shown here were representative of three  
8 independent experiments using tissues from six different mice. Scale bar=100  $\mu$ m. **(B)**. Schematic  
9 representation of RTX treatment and VMR measurement. **(C)**. Summary data showing that  
10 ablation of TRPV1-expressing nociceptors with RTX significantly reduces CRD-induced VMR.  
11 \* $P < 0.05$ , \*\*\*\* $P < 0.0001$ , two-way ANOVA,  $n=5$  mice per group. **(D-E)**. Summary data showing  
12 that ablation of TRPV1-expressing nociceptors with RTX did not significantly change mechanical  
13 pain **(D)**, but significantly reduced thermal pain in the paw **(E)**. n.s., no significant difference,  
14 \*\*\*\* $P < 0.0001$  unpaired  $t$  test,  $n=9$  mice per group. **(F-G)**. Viral-mediated ablation of colon-  
15 innervating TRPV1-expressing neurons did not significantly affect either mechanical pain **(F)** or  
16 thermal pain **(G)**. n.s., no significant difference, unpaired  $t$  test,  $n=4$  to  $5$  mice per group. All data  
17 are expressed as means  $\pm$  S.E.

18

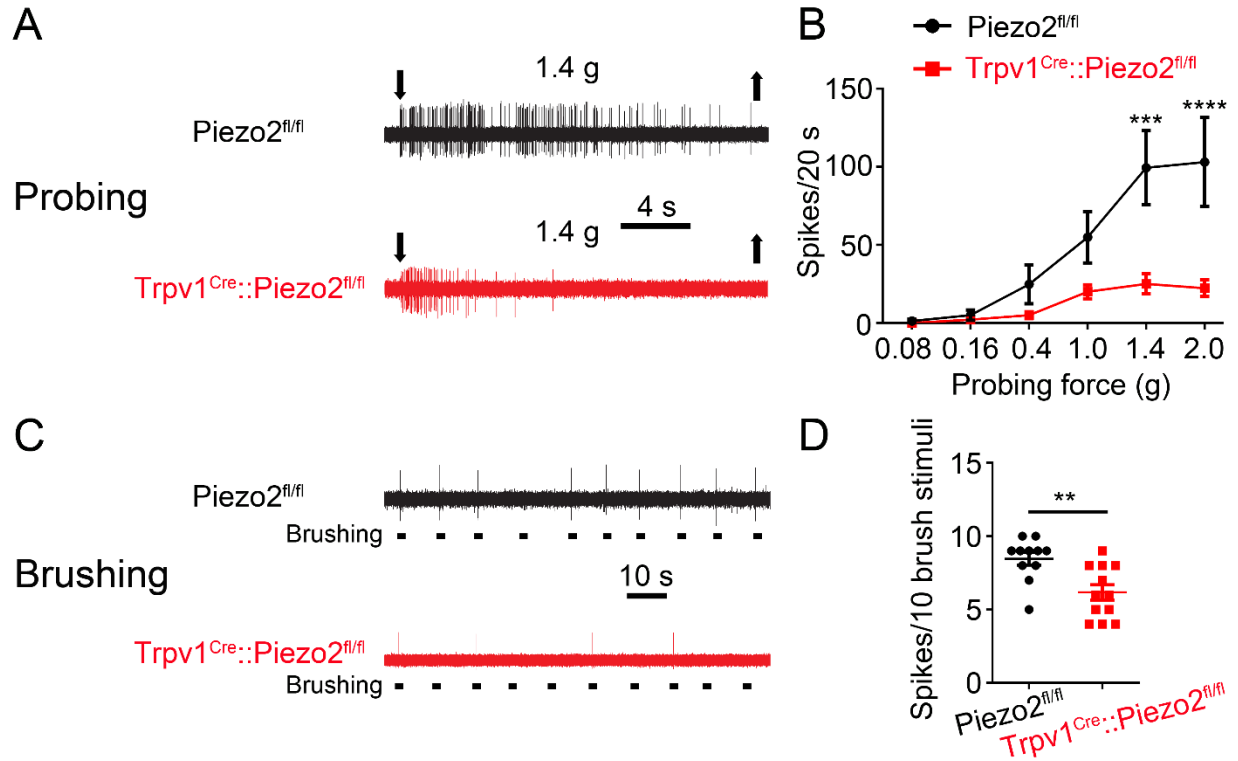

19

20 **Figure S2 (Related to Figure 2). Conditional knockout of Piezo2 from TRPV1-lineage**  
 21 **neurons attenuates colon afferent firing in response to mechanical probing and brushing.**

22 (A). Representative traces of colon pelvic nerve recordings from Piezo2<sup>fl/fl</sup> and Trpv1<sup>Cre::</sup>Piezo2<sup>fl/fl</sup>

23 mice in response to probing. (B). Summary data of colon pelvic nerve recording of Piezo2<sup>fl/fl</sup> and

24 Trpv1<sup>Cre::</sup>Piezo2<sup>fl/fl</sup> mice in response to probing. \*\*\*P < 0.001, \*\*\*\*P < 0.0001, two-way ANOVA,

25 n=9 units from 3 mice for Piezo2<sup>fl/fl</sup> group and n=9 units from 4 mice for Trpv1<sup>Cre::</sup>Piezo2<sup>fl/fl</sup> group.

26 (C). Representative traces of colon pelvic nerve recordings from Piezo2<sup>fl/fl</sup> and Trpv1<sup>Cre::</sup>Piezo2<sup>fl/fl</sup>

27 mice in response to brushing. (D). Summary data of colon pelvic nerve recording of Piezo2<sup>fl/fl</sup> and

28 Trpv1<sup>Cre::</sup>Piezo2<sup>fl/fl</sup> mice in response to brushing. \*\*P < 0.01, unpaired *t* test, n=11 units from 8

29 mice for Piezo2<sup>fl/fl</sup> group and n=12 units from 9 mice for Trpv1<sup>Cre::</sup>Piezo2<sup>fl/fl</sup> group.

30

A

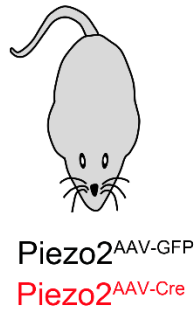

B

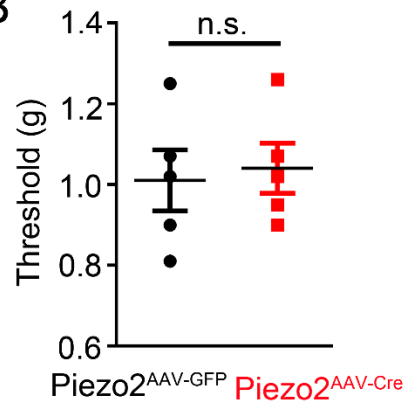

C

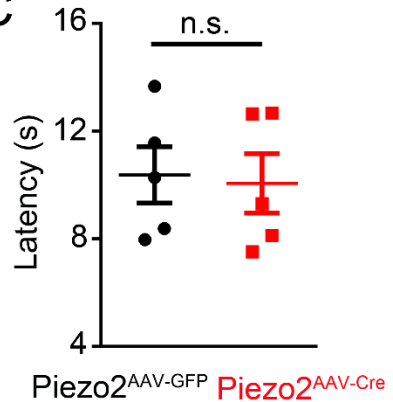

31

32 **Figure S3 (Related to Figure 3). Virally-mediated knockdown of PIEZO2 function from**  
 33 **colon-innervating DRG neurons does not affect somatic pain.** (A). Schematic representation of  
 34 Piezo2<sup>fl/fl</sup> mice. (B). PIEZO2<sup>AAV-GFP-Cre</sup> mice showed comparative somatic mechanical pain with  
 35 PIEZO2<sup>AAV-GFP</sup> mice in the paw. (C). PIEZO2<sup>AAV-GFP-Cre</sup> mice showed comparative thermal pain  
 36 with PIEZO2<sup>AAV-GFP</sup> mice in the paw. n.s., no significant difference, unpaired *t* test, n=5 mice per  
 37 group. All data are expressed as means ± S.E.

38

39

40

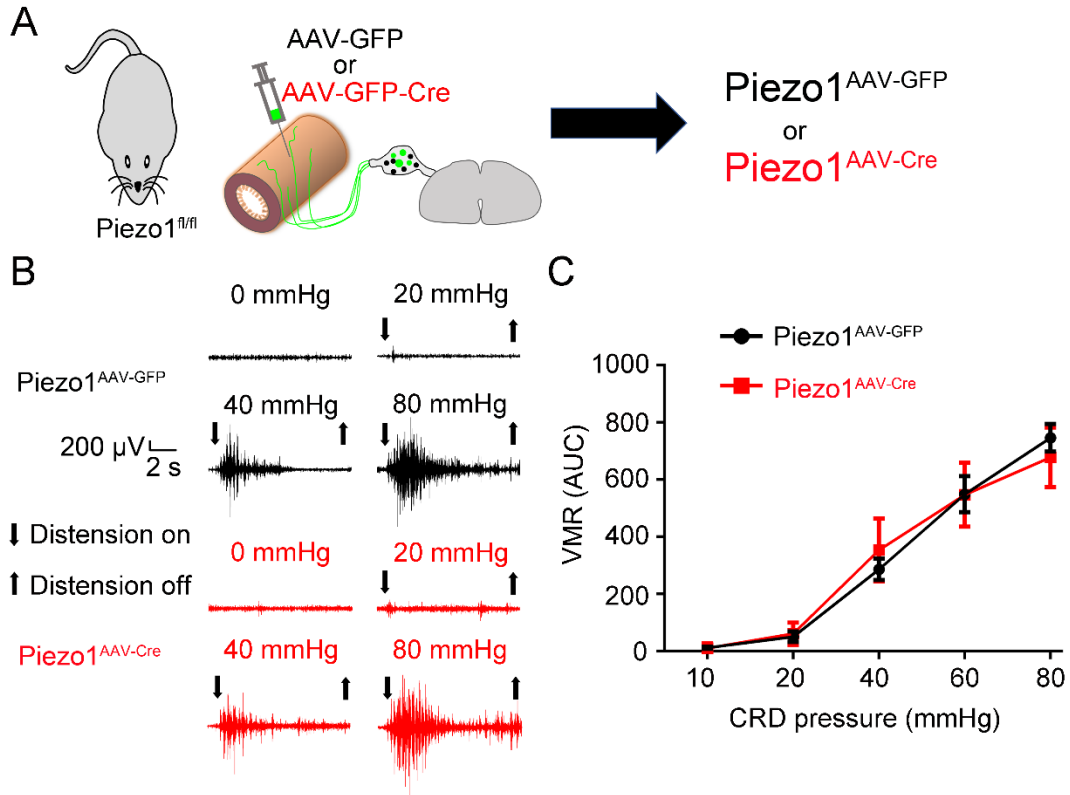

41  
 42 **Figure S4 (Related to Figure 3). Virally-mediated knockdown of PIEZO1 function in colon-**  
 43 **innervating DRG neurons does not affect visceral mechanical nociception. (A).** Schematic  
 44 representation of intracolonic injection of AAV encoding GFP or GFP-Cre into the Piezo1<sup>fl/fl</sup> mice.  
 45 **(B).** Representative electromyogram recording elicited by graded CRD pressures in PIEZO1<sup>AAV-</sup>  
 46 <sup>GFP</sup> mice and PIEZO1<sup>AAV-GFP-Cre</sup> mice. **(C).** Summary data showing that PIEZO1<sup>AAV-GFP-Cre</sup> mice  
 47 display comparable CRD-induced VMRs with those in the PIEZO1<sup>AAV-GFP</sup> mice. n.s., no  
 48 significant difference, two-way ANOVA, n=5 mice per group. All data are expressed as means  $\pm$   
 49 S.E.

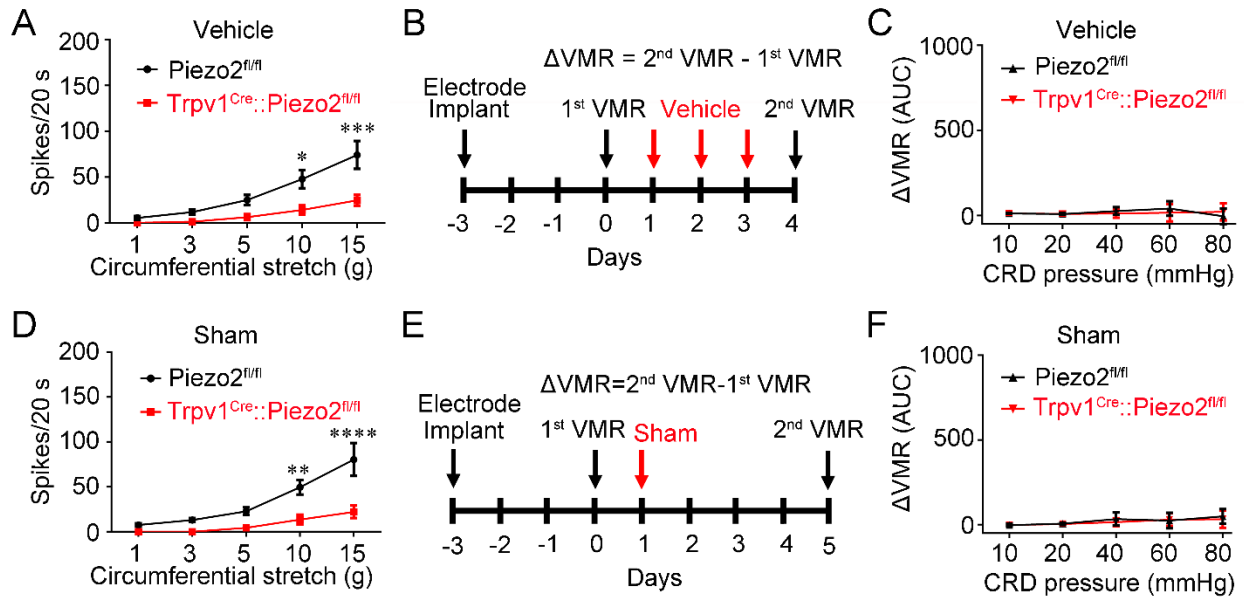

50

51 **Figure S5 (Related to Figure 4 and Figure 5). Vehicle for zymosan treatment or sham for**  
 52 **PCO surgery does not induce visceral hypersensitivity. (A).** Summary data of stretch stimuli-  
 53 induced nerve firings of colon nerve recording in  $Piezo2^{fl/fl}$  and  $Trpv1^{Cre::Piezo2^{fl/fl}}$  mice subjected  
 54 to vehicle treatment. \* $P < 0.05$ ; \*\*\* $P < 0.001$ , two-way ANOVA.  $n=20$  units from 6 mice for  
 55  $Piezo2^{fl/fl}$  group and  $n=12$  units from 4 mice for  $Trpv1^{Cre::Piezo2^{fl/fl}}$  group. (B). Schematic diagram  
 56 showing the timing of vehicle treatment and VMR recording. (C). Summary data showing that  
 57 neither  $Piezo2^{fl/fl}$  nor  $Trpv1^{Cre::Piezo2^{fl/fl}}$  mice displayed visceral hypersensitivity after vehicle  
 58 treatment. (D). Summary data of stretch stimuli-induced nerve firings of colon nerve recording in  
 59  $Piezo2^{fl/fl}$  and  $Trpv1^{Cre::Piezo2^{fl/fl}}$  mice subjected to sham surgery. \*\* $P < 0.01$ ; \*\*\*\* $P < 0.0001$ ,  
 60 two-way ANOVA.  $n=18$  units from 6 mice for  $Piezo2^{fl/fl}$  group and  $n=14$  units from 5 mice for  
 61  $Trpv1^{Cre::Piezo2^{fl/fl}}$  group. (E). Schematic diagram showing the timing of sham surgery and VMR  
 62 recording. (F). Summary data showing that neither  $Piezo2^{fl/fl}$  nor  $Trpv1^{Cre::Piezo2^{fl/fl}}$  mice  
 63 displayed visceral hypersensitivity after sham surgery. Two-way ANOVA,  $n=5$  mice per group.

64

65

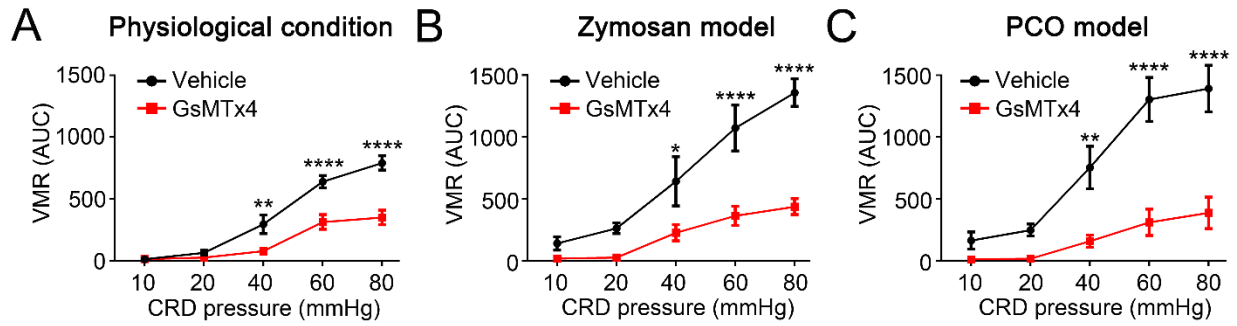

66

67 **Figure S6 (Related to Figure 4 and Figure 5). Pretreatment with GsMTx4 inhibits CRD-**  
 68 **induced visceral nociception under physiological condition and visceral hypersensitivity**  
 69 **induced by zymosan or PCO. (A).** CRD-induced VMR after application of vehicle or GsMTx4  
 70 in wild-type mice under normal conditions. **(B).** CRD-induced VMR after application of vehicle  
 71 or GsMTx4 in zymosan-treated mice. **(C).** CRD-induced VMR after application of vehicle or  
 72 GsMTx4 in mice subjected to PCO procedure. Two-way ANOVA, n=5 mice per group. \*P<0.05,  
 73 \*\*P<0.01, \*\*\*\*P<0.0001. All data are expressed as means  $\pm$  S.E.

74

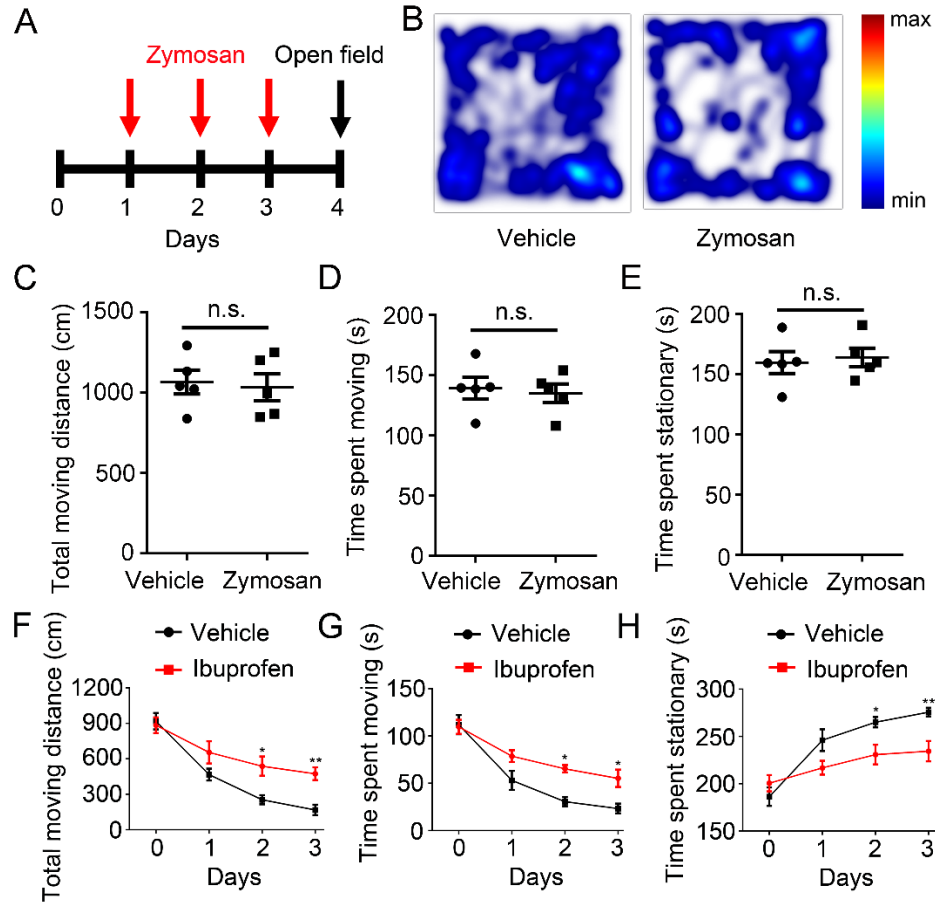

75  
 76 **Figure S7 (Related to Figure 7). PCO but not Zymosan treatment affects pain-related**  
 77 **voluntary movements.** (A). Schematic representation of zymosan treatment and open field  
 78 recording. (B). Representative images illustrating heat maps of voluntary movements of mice  
 79 subjected to vehicle treatment (left) and zymosan treatment (right) in open field test using home  
 80 cages. (C-E). Quantification of voluntary movements including total moving distance (C), total  
 81 time spent on moving (D) and total time spent on stationary (E) in vehicle- and zymosan-treated  
 82 mice. n.s., no significant difference, unpaired *t* test, *n*=5 mice per group. All data are expressed as  
 83 means  $\pm$  S.E. (F-H). Ibuprofen-treated PCO mice showed significantly increased moving distance  
 84 (F), total time spent on moving (G), and decreased time spent on stationary (H) compared to  
 85 vehicle-treated PCO mice. Intraperitoneal injection of ibuprofen at a dose of 50 mg/kg was  
 86 administered 30 min before open field test. Two-way ANOVA, *n*=5 mice per group. \**p* < 0.05,  
 87 \*\**p* < 0.01. All data are expressed as means  $\pm$  S.E.

88  
 89
